# Supplementary material
Source: PubMed Central journal article supplement (PMC9068205)
Supplement: NIHMS1793103-supplement-1.pdf [file NIHMS1793103-supplement-1.pdf]

## Supplementary Materials for

### **Fetal genome profiling at 5 weeks of gestation after noninvasive isolation of trophoblast cells from the endocervical canal**

Chandni V. Jain, Leena Kadam, Marie van Dijk, Hamid-Reza Kohan-Ghadr,  
Brian A. Kilburn, Craig Hartman, Vicki Mazzorana, Allerdien Visser, Michael Hertz,  
Alan D. Bolnick, Rani Fritz, D. Randall Armant, Sascha Drewlo\*

\*Corresponding author. Email: sdrewlo@med.wayne.edu

Published 2 November 2016, *Sci. Transl. Med.* **8**, 363re4 (2016)  
DOI: 10.1126/scitranslmed.aah4661

#### **This PDF file includes:**

- Fig. S1. Comparison of fetal fractions obtained with and without nuclear isolation.
- Fig. S2. Cutoff determination for STR allele percentages.
- Fig. S3. Comparison of approaches to obtain fetal DNA in ongoing pregnancies.
- Table S1. List of SNVs and STRs targeted by ForenSeq.

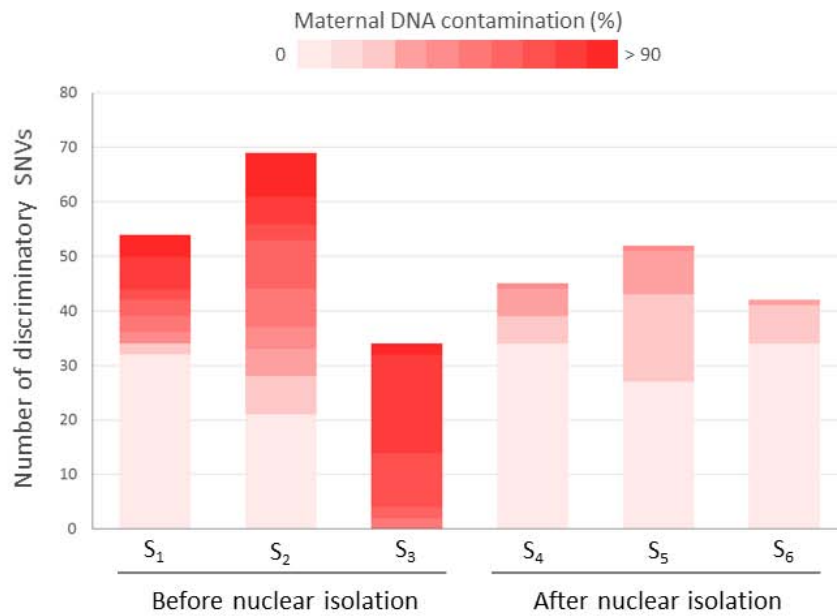

**Figure S1. Comparison of fetal fractions obtained with and without nuclear isolation.**

The stacked bar graph shows the distribution of co-purifying maternal DNA (calculated as percentages and represented by deeper red color) in DNA from TRIC-isolated fetal trophoblast cells among discriminatory SNVs (y-axis). Samples S1-3, sequenced without fetal cell nuclear isolation, show high proportions of maternal SNVs. Samples S4-6 were subjected to nuclear isolation before sequencing and show that detection reduced the number of maternal SNVs.

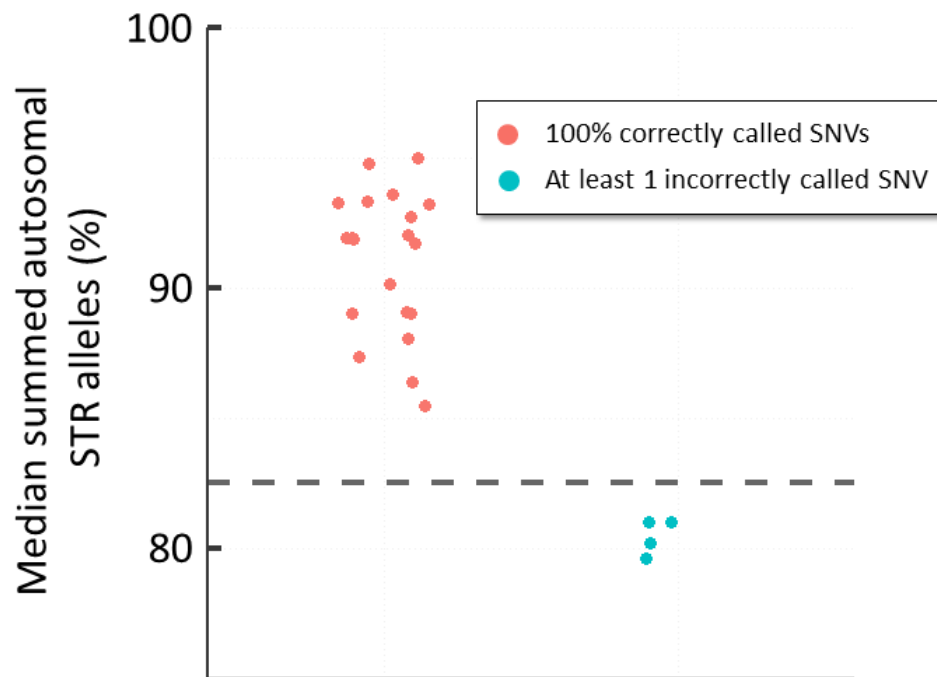

**Figure S2. Cutoff determination for STR allele percentages.** The scatter plot visualizes the median percentage of summed autosomal STR alleles in TRIC isolated fetal trophoblast cells (n=24). Percentage above 82.5% resulted in 100% correct fetal haplotyping and was therefore used as a threshold to ensure sample quality in the presented study.

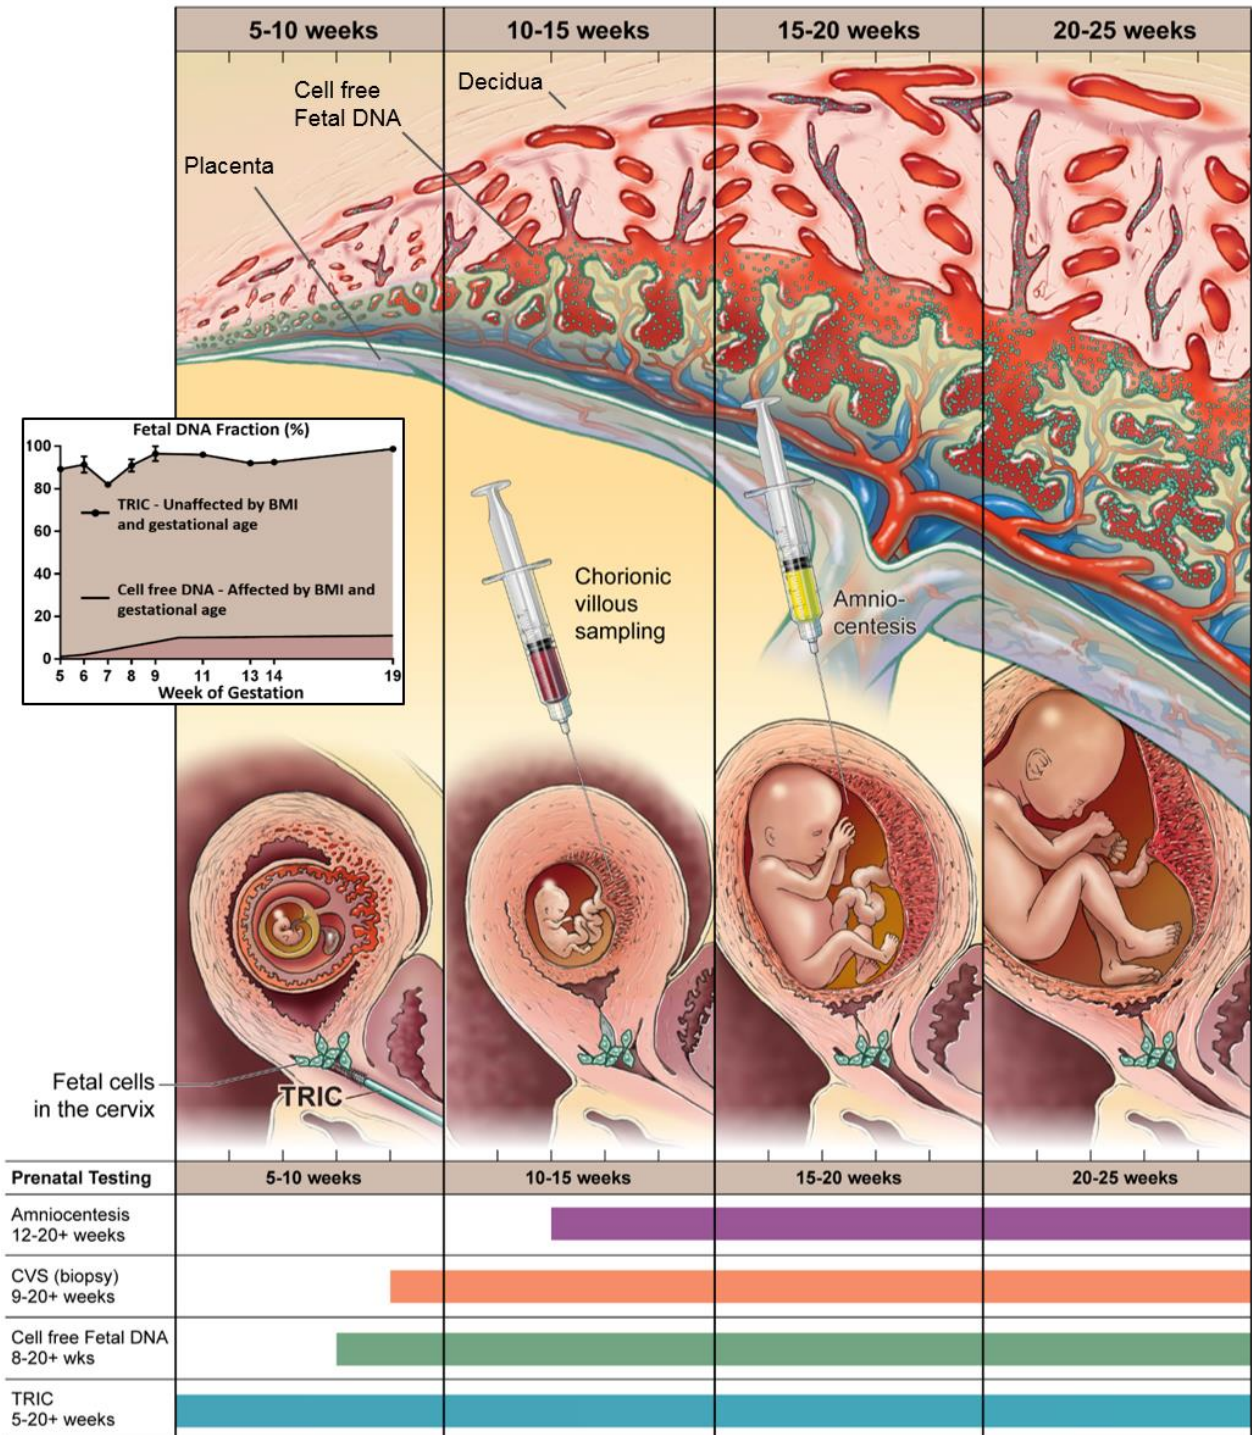

**Figure S3. Comparison of approaches to obtain fetal DNA in ongoing pregnancies.** Sources of fetal DNA throughout early pregnancy are illustrated according to their accessibility during gestation. Amniocentesis is available beginning at 12 weeks of gestational age (GA) and is invasive, but provides intact fetal cells from amniotic fluid that are adequate for genetic diagnosis. Chorionic villous sampling (CVS), first available at 9 weeks of GA, provides fetal DNA from intact cells of a placental biopsy obtained invasively. Fetal trophoblast cells are extremely rare in maternal blood; however, the plasma concentration of fetal DNA fragments, released as syncytiotrophoblast cells turn over, rises with increasing GA. This cell-free fetal DNA can be obtained non-invasively from maternal blood, as early as 8 weeks of GA, and can be analyzed using multiple parallel sequencing combined with extensive computational analysis to distinguish it from cell-free maternal DNA. Hundreds of intact trophoblast cells that enter the reproductive tract can be safely retrieved from noninvasive Pap smears using a cytobrush. TRIC captures these trophoblast cells beginning at 5 weeks of GA. The inset graphically compares the fetal fraction of DNA that is available between 5 and 19 weeks of GA using cell-free DNA in maternal serum and genomic DNA that we have isolated after TRIC.

| Sr.No | SNP name   | Sr.No | SNP name   | Sr.No | STR name | Sr.No | STR name    |
|-------|------------|-------|------------|-------|----------|-------|-------------|
| 01    | rs1490413  | 48    | rs1498553  | 01    | D1S1656  | 48    | DYS438      |
| 02    | rs560681   | 49    | rs901398   | 02    | TPOX     | 49    | DYS612      |
| 03    | rs1294331  | 50    | rs10488710 | 03    | D2S441   | 50    | DYS390      |
| 04    | rs10495407 | 51    | rs2076848  | 04    | D2S1338  | 51    | DYS643      |
| 05    | rs891700   | 52    | rs2107612  | 05    | D3S1358  | 52    | DYS533      |
| 06    | rs1413212  | 53    | rs2269355  | 06    | D4S2408  | 53    | Y- GATA- H4 |
| 07    | rs876724   | 54    | rs2920816  | 07    | FGA      | 54    | DYS385a-b   |
| 08    | rs1109037  | 55    | rs2111980  | 08    | D5S818   | 55    | DYS460      |
| 09    | rs993934   | 56    | rs10773760 | 09    | CSF1PO   | 56    | DYS549      |
| 10    | rs12997453 | 57    | rs1335873  | 10    | D6S1043  | 57    | DYS392      |
| 11    | rs907100   | 58    | rs1886510  | 11    | D7S820   | 58    | DYS448      |
| 12    | rs1357617  | 59    | rs1058083  | 12    | D8S1179  | 59    | DYF387S1    |
| 13    | rs4364205  | 60    | rs354439   | 13    | D9S1122  |       |             |
| 14    | rs2399332  | 61    | rs1454361  | 14    | D10S1248 |       |             |
| 15    | rs1355366  | 62    | rs722290   | 15    | TH01     |       |             |
| 16    | rs6444724  | 63    | rs873196   | 16    | vWA      |       |             |
| 17    | rs2046361  | 64    | rs4530059  | 17    | D12S391  |       |             |
| 18    | rs279844   | 65    | rs1821380  | 18    | D13S317  |       |             |
| 19    | rs6811238  | 66    | rs8037429  | 19    | PentaE   |       |             |
| 20    | rs1979255  | 67    | rs1528460  | 20    | D16S539  |       |             |
| 21    | rs717302   | 68    | rs729172   | 21    | D17S1301 |       |             |
| 22    | rs159606   | 69    | rs2342747  | 22    | D18S51   |       |             |
| 23    | rs13182883 | 70    | rs430046   | 23    | D19S433  |       |             |
| 24    | rs251934   | 71    | rs1382387  | 24    | D20S482  |       |             |
| 25    | rs338882   | 72    | rs9905977  | 25    | D21S11   |       |             |
| 26    | rs13218440 | 73    | rs740910   | 26    | PentaD   |       |             |
| 27    | rs1336071  | 74    | rs938283   | 27    | D22S1045 |       |             |
| 28    | rs214955   | 75    | rs8078417  | 28    | DXS10135 |       |             |
| 29    | rs727811   | 76    | rs1493232  | 29    | DXS8378  |       |             |
| 30    | rs6955448  | 77    | rs9951171  | 30    | AMELX    |       |             |
| 31    | rs917118   | 78    | rs1736442  | 31    | DXS7132  |       |             |
| 32    | rs321198   | 79    | rs1024116  | 32    | DXS10074 |       |             |
| 33    | rs737681   | 80    | rs719366   | 33    | DXS10103 |       |             |
| 34    | rs763869   | 81    | rs576261   | 34    | HPRTB    |       |             |
| 35    | rs10092491 | 82    | rs1031825  | 35    | DXS7423  |       |             |
| 36    | rs2056277  | 83    | rs445251   | 36    | DYS505   |       |             |
| 37    | rs4606077  | 84    | rs1005533  | 37    | DYS570   |       |             |
| 38    | rs1015250  | 85    | rs1523537  | 38    | DYS576   |       |             |
| 39    | rs7041158  | 86    | rs722098   | 39    | DYS522   |       |             |
| 40    | rs1463729  | 87    | rs2830795  | 40    | DYS481   |       |             |
| 41    | rs1360288  | 88    | rs2831700  | 41    | DYS19    |       |             |
| 42    | rs10776839 | 89    | rs914165   | 42    | DYS391   |       |             |
| 43    | rs826472   | 90    | rs221956   | 43    | DYS635   |       |             |
| 44    | rs735155   | 91    | rs733164   | 44    | DYS437   |       |             |
| 45    | rs3780962  | 92    | rs987640   | 45    | DYS439   |       |             |
| 46    | rs740598   | 93    | rs2040411  | 46    | DYS389I  |       |             |
| 47    | rs964681   | 94    | rs1028528  | 47    | DYS389II |       |             |

**Table S1. List of SNVs and STRs targeted by ForenSeq.**
